# Supplementary material
Source: PubMed Central journal article supplement (PMC10591522)
Supplement: NIHMS1938614-supplement-Supplementary_figures.pdf [file NIHMS1938614-supplement-Supplementary_figures.pdf]

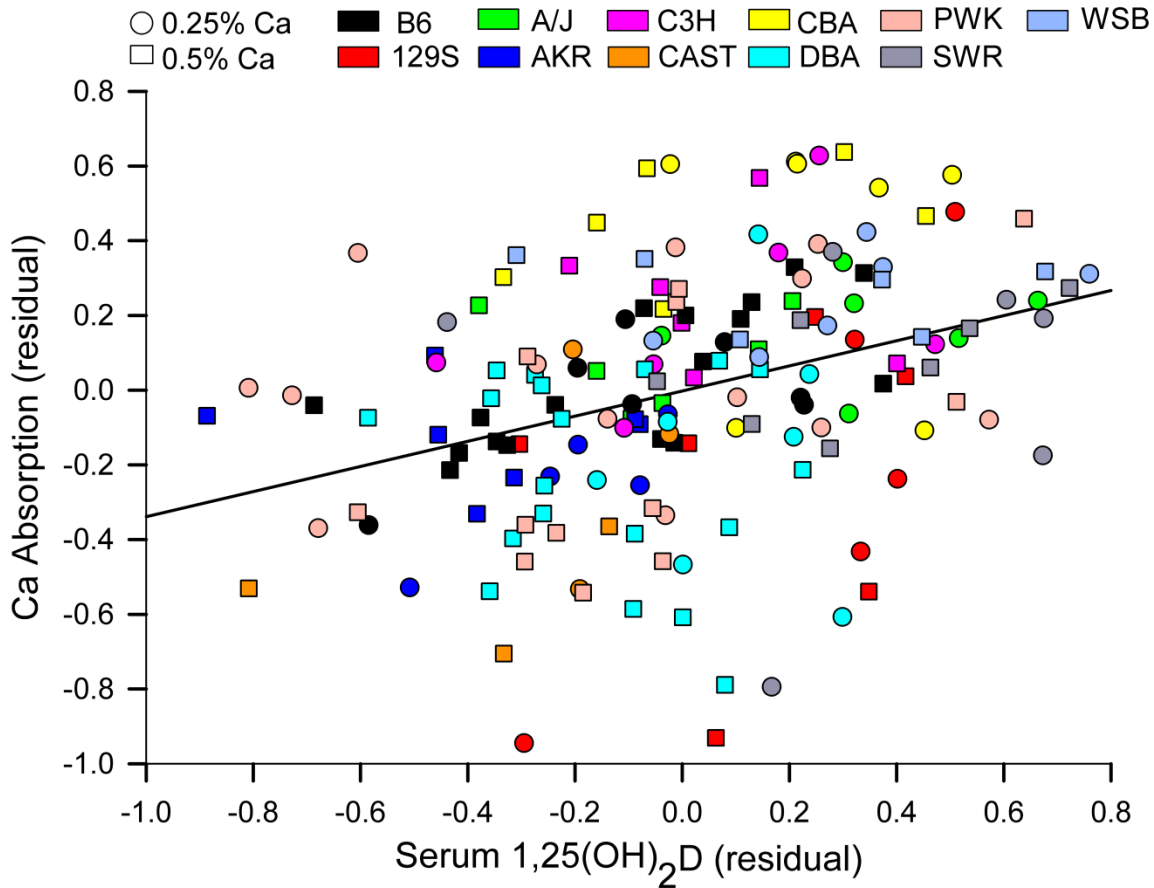

**Supplemental Fig. 1.** Genetic diversity affects the relationship between 1,25(OH)<sub>2</sub>D and Ca absorption. Ca absorption and serum 1,25(OH)<sub>2</sub>D levels were examined in 3 mo. old mice fed either a 0.5% or 0.25% Ca diet starting at 4 wks of age. Transformed, body-size corrected residuals are plotted for the entire population of 11 inbred mouse lines. The relationship between serum 1,25(OH)<sub>2</sub>D and intestinal Ca absorption across the 11 inbred lines ( $r=0.35$ ,  $p<0.001$ ,  $n=166$ ) is weaker than that observed for the B6 line alone ( $r=0.65$ ,  $p<0.01$ ,  $n=24$ ).

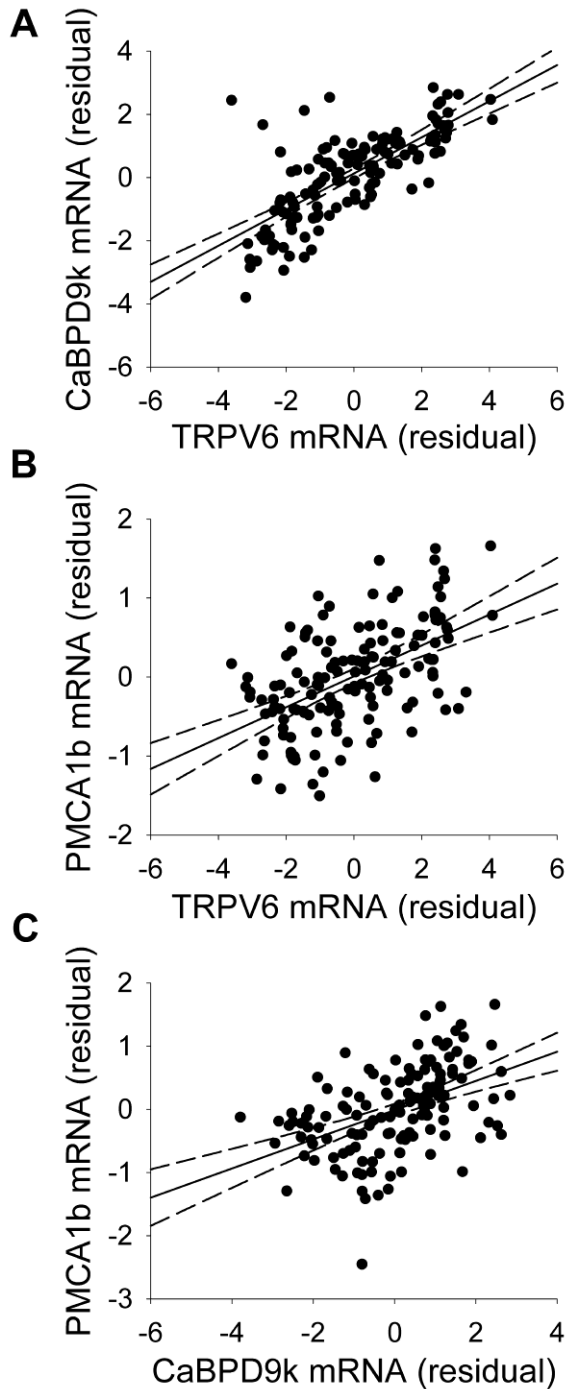

**Supplemental Fig. 2.** Key members in the facilitated diffusion model are interrelated at the mRNA level. Duodenal tissue was harvested from 3 mo. old mice fed either a 0.5% or 0.25% Ca diet starting at 4 wks of age then RNA was isolated and analyzed for specific mRNA levels by real-time PCR. mRNA of the 3 key members in the facilitated diffusion of Ca absorption were each significantly correlated to the others. (A) TRPV6 to CaBPD9k ( $r=0.74$ ,  $p<0.0001$ ,  $n=140$ ), (B) TRPV6 to PMCA1b ( $r=0.53$ ,  $p<0.0001$ ,  $n=142$ ), and (C) CaBPD9k to PMCA1b ( $r=0.47$ ,  $p<0.0001$ ,  $n=141$ ). Data are shown as body size-corrected residuals with 95% confidence intervals.

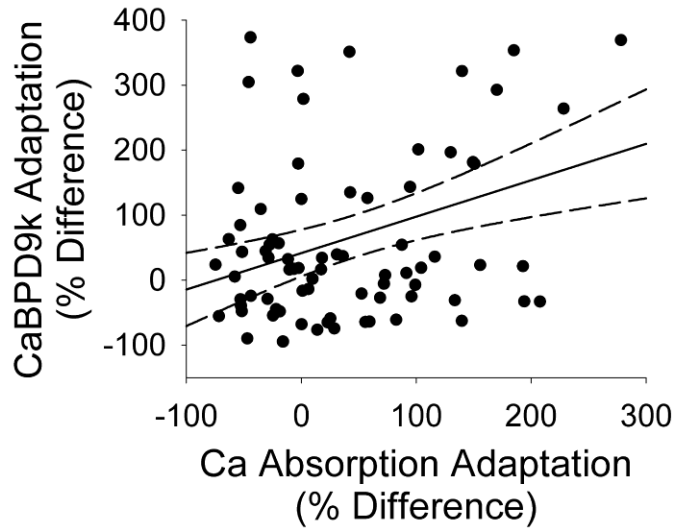

**Supplemental Fig. 3.** Adaptation of CaBPD9k to a low Ca diet is significantly, positively correlated with adaptation of Ca absorption to a low Ca diet. Ca absorption and duodenal mRNA was examined in 3 mo old mice fed a 0.5% or 0.25% Ca diet starting at 4 wks of age. An adaptation parameter was calculated for each mouse on the 0.25% diet. Pearson's correlation was calculated using individual values from mice representing all 11 inbred lines with data points present for both phenotypes ( $r=0.38$ ,  $p<0.001$ ,  $n=79$ ), dotted line = 95% confidence interval.
